# Supplementary material
Source: PubMed Central journal article supplement (PMC546131)
Supplement: nar_33_1_27__1.pdf [file nar_33_1_27__1.pdf]

**A**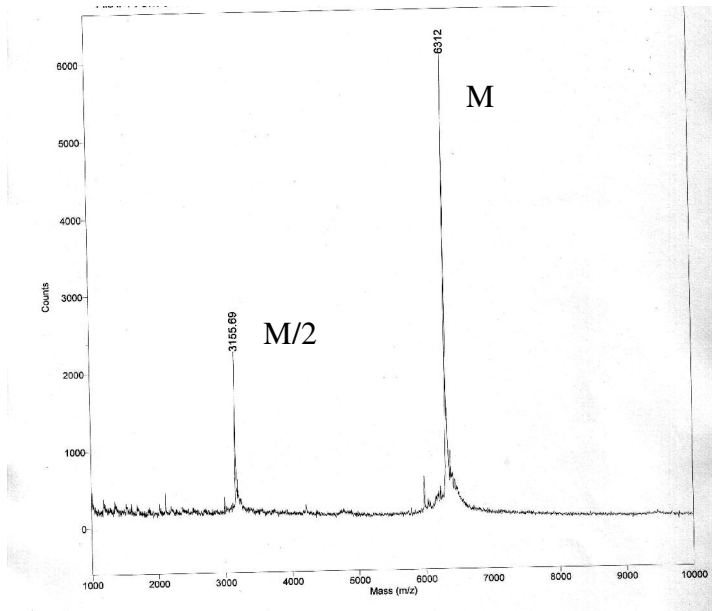**B**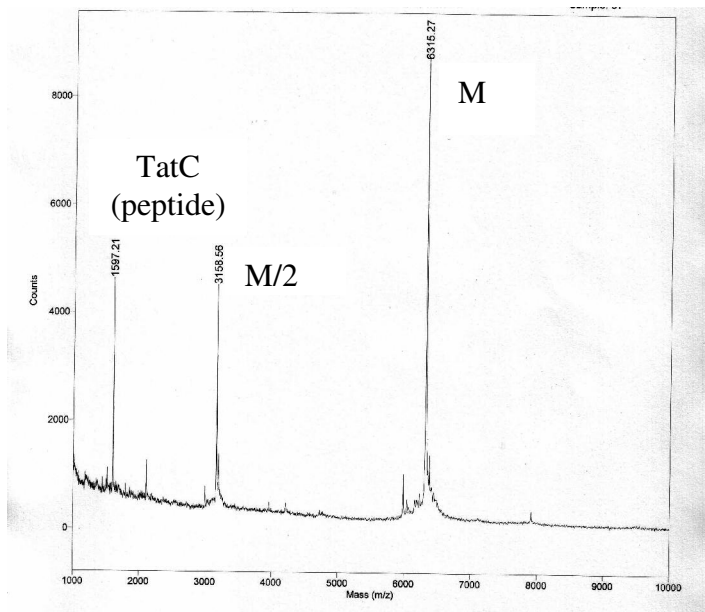

**Supplementary Figure.** (A) MALDI-TOF spectrum of purified conjugate **4** showing the absence of peptide TatC and (B) MALDI-TOF spectrum of conjugate **4** with 0.5 equivalents of peptide TatC added (matrix is 2,4,6-trihydroxyacetophenone satd. in acetonitrile/50mM diammonium hydrogen citrate aq.). Note that a M/2 peak is often obtained with this THAP matrix, which is of variable intensity.
